# Supplementary material for: Importance of water and intramolecular interaction governs substantial blue shift of Csp2–H stretching frequency in complexes between chalcogenoaldehydes and water
Source: Royal Society of Chemistry journal article supplement (doi:10.1039/d1ra07444j), 2022-01-01
Supplement: d1ra07444j1.pdf [file d1ra07444j1.pdf]

## Supporting Information

### Importance of Water and Intramolecular Interaction Governs Substantial Blue Shift of $C_{sp^2}-H$ Stretching Frequency in the Complexes between Chalcogenoaldehydes and Waters

Nguyen Thi Thanh Cuc<sup>1</sup>, Nguyen Truong An<sup>1</sup>, Vu Thi Ngan<sup>1</sup>, Asit. K. Chandra<sup>2</sup>, Nguyen Tien Trung\*<sup>1</sup>

<sup>1</sup>Laboratory of Computational Chemistry and Modelling (LCCM), Department of Chemistry, Faculty of Natural Sciences, Quy Nhon University, Vietnam

<sup>2</sup>Department of Chemistry, North-Eastern Hill University, Shillong 793022, Meghalaya, India

**Table S1** Contact distances R1, R2, R3, R4 (Å) in the complexes at MP2/6-311++G(3df,2pd)

|           | <b>HO-1</b>  | <b>FO-1</b>  | <b>ClO-1</b>  | <b>BrO-1</b>  | <b>CH<sub>3</sub>O-1</b>  | <b>HS-1</b>  | <b>FS-1</b>  | <b>CIS-1</b>  | <b>BrS-1</b>  | <b>CH<sub>3</sub>S-1</b>  |
|-----------|--------------|--------------|---------------|---------------|---------------------------|--------------|--------------|---------------|---------------|---------------------------|
| <b>R1</b> | 1.98         | 2.18         | 2.18          | 2.21          | 1.93                      | 2.47         | 2.63         | 2.60          | 2.61          | 2.44                      |
| <b>R2</b> | 2.62         | 2.45         | 2.43          | 2.42          | 2.66                      | 2.45         | 2.33         | 2.32          | 2.33          | 2.47                      |
|           | <b>HSe-1</b> | <b>FSe-1</b> | <b>ClSe-1</b> | <b>BrSe-1</b> | <b>CH<sub>3</sub>Se-1</b> | <b>HTe-1</b> | <b>FTe-1</b> | <b>CITe-1</b> | <b>BrTe-1</b> | <b>CH<sub>3</sub>Te-1</b> |
| <b>R1</b> | 2.61         | 2.73         | 2.72          | 2.72          | 2.58                      | 2.82         | 2.93         | 2.91          | 2.91          | 2.79                      |
| <b>R2</b> | 2.44         | 2.32         | 2.31          | 2.32          | 2.44                      | 2.46         | 2.33         | 2.31          | 2.32          | 2.45                      |
|           | <b>HO-2</b>  | <b>FO-2</b>  | <b>ClO-2</b>  | <b>BrO-2</b>  | <b>CH<sub>3</sub>O-2</b>  | <b>HS-2</b>  | <b>FS-2</b>  | <b>CIS-2</b>  | <b>BrS-2</b>  | <b>CH<sub>3</sub>S-2</b>  |
| <b>R1</b> | 1.87         | 1.96         | 1.97          | 1.99          | 1.84                      | 2.37         | 2.43         | 2.42          | 2.42          | 2.34                      |
| <b>R2</b> | 2.28         | 2.15         | 2.14          | 2.13          | 2.31                      | 2.22         | 2.12         | 2.10          | 2.10          | 2.24                      |
| <b>R3</b> | 1.86         | 1.87         | 1.87          | 1.87          | 1.85                      | 1.87         | 1.87         | 1.87          | 1.87          | 1.86                      |
|           | <b>HSe-2</b> | <b>FSe-2</b> | <b>ClSe-2</b> | <b>BrSe-2</b> | <b>CH<sub>3</sub>Se-2</b> | <b>HTe-2</b> | <b>FTe-2</b> | <b>CITe-2</b> | <b>BrTe-2</b> | <b>CH<sub>3</sub>Te-2</b> |
| <b>R1</b> | 2.50         | 2.55         | 2.54          | 2.55          | 2.48                      | 2.71         | 2.75         | 2.74          | 2.74          | 2.69                      |
| <b>R2</b> | 2.22         | 2.12         | 2.11          | 2.11          | 2.23                      | 2.24         | 2.14         | 2.12          | 2.12          | 2.25                      |
| <b>R3</b> | 1.87         | 1.87         | 1.87          | 1.87          | 1.86                      | 1.88         | 1.87         | 1.87          | 1.87          | 1.87                      |
|           | <b>HO-3</b>  | <b>FO-3</b>  | <b>ClO-3</b>  | <b>BrO-3</b>  | <b>CH<sub>3</sub>O-3</b>  | <b>HS-3</b>  | <b>FS-3</b>  | <b>CIS-3</b>  | <b>BrS-3</b>  | <b>CH<sub>3</sub>S-3</b>  |
| <b>R1</b> | 1.83         | 1.90         | 1.90          | 1.92          | 1.79                      | 2.34         | 2.39         | 2.38          | 2.38          | 2.29                      |
| <b>R2</b> | 2.19         | 2.04         | 2.03          | 2.01          | 2.24                      | 2.16         | 2.05         | 2.03          | 2.02          | 2.44                      |
| <b>R3</b> | 1.78         | 1.79         | 1.79          | 1.80          | 1.77                      | 1.79         | 1.80         | 1.80          | 1.80          | 1.80                      |
| <b>R4</b> | 1.81         | 1.79         | 1.80          | 1.80          | 1.81                      | 1.81         | 1.80         | 1.80          | 1.80          | 1.82                      |
|           | <b>HSe-3</b> | <b>FSe-3</b> | <b>ClSe-3</b> | <b>BrSe-3</b> | <b>CH<sub>3</sub>Se-3</b> | <b>HTe-3</b> | <b>FTe-3</b> | <b>CITe-3</b> | <b>BrTe-3</b> | <b>CH<sub>3</sub>Te-3</b> |
| <b>R1</b> | 2.48         | 2.51         | 2.51          | 2.51          | 2.43                      | 2.69         | 2.71         | 2.71          | 2.71          | 2.64                      |
| <b>R2</b> | 2.16         | 2.05         | 2.04          | 2.03          | 2.45                      | 2.16         | 2.07         | 2.05          | 2.05          | 2.45                      |
| <b>R3</b> | 1.80         | 1.80         | 1.80          | 1.80          | 1.80                      | 1.80         | 1.81         | 1.81          | 1.81          | 1.81                      |
| <b>R4</b> | 1.82         | 1.80         | 1.80          | 1.80          | 1.82                      | 1.82         | 1.81         | 1.81          | 1.81          | 1.83                      |

**Table S2a** Electron density ( $\rho(r)$ ), Laplacian of electron density ( $\nabla^2\rho(r)$ ), total electron energy density ( $H(r)$ ) and individual energy of H-bond ( $E_{\text{H-bond}}$ ) at BCPs of intermolecular contacts in **XZ-1**

| Complex                   | H-bonds                  | $\rho(r)$ (au) | $\nabla^2\rho(r)$ (au) | $H(r)$ (au) | $E_{\text{H-bond}}$ (kJ.mol <sup>-1</sup> ) |
|---------------------------|--------------------------|----------------|------------------------|-------------|---------------------------------------------|
| <b>HO-1</b>               | C <sub>sp2</sub> -H...O2 | -              | -                      | -           | -                                           |
|                           | O2-H1...O                | 0.0237         | 0.082                  | 0.0003      | -26.0                                       |
| <b>HS-1</b>               | C <sub>sp2</sub> -H...O2 | 0.0089         | 0.038                  | 0.0015      | -8.7                                        |
|                           | O2-H1...S                | 0.0165         | 0.043                  | 0.0001      | -14.1                                       |
| <b>HSe-1</b>              | C <sub>sp2</sub> -H...O2 | 0.0088         | 0.038                  | 0.0015      | -8.5                                        |
|                           | O2-H1...Se               | 0.0145         | 0.037                  | 0.0004      | -11.3                                       |
| <b>HTe-1</b>              | C <sub>sp2</sub> -H...O2 | 0.0083         | 0.034                  | 0.0013      | -7.8                                        |
|                           | O2-H1...Te               | 0.0122         | 0.028                  | 0.0004      | -8.1                                        |
| <b>FO-1</b>               | C <sub>sp2</sub> -H...O2 | 0.0097         | 0.044                  | 0.0018      | -9.7                                        |
|                           | O2-H1...O                | 0.0154         | 0.061                  | 0.0015      | -15.8                                       |
| <b>FS-1</b>               | C <sub>sp2</sub> -H...O2 | 0.0111         | 0.047                  | 0.0019      | -10.6                                       |
|                           | O2-H1...S                | 0.0120         | 0.036                  | 0.0008      | -9.7                                        |
| <b>FSe-1</b>              | C <sub>sp2</sub> -H...O2 | 0.0112         | 0.047                  | 0.0018      | -10.6                                       |
|                           | O2-H1...Se               | 0.0112         | 0.032                  | 0.0008      | -8.3                                        |
| <b>FTe-1</b>              | C <sub>sp2</sub> -H...O2 | 0.0109         | 0.045                  | 0.0017      | -10.3                                       |
|                           | O2-H1...Te               | 0.0103         | 0.025                  | 0.0005      | -7.0                                        |
| <b>ClO-1</b>              | C <sub>sp2</sub> -H...O2 | 0.0099         | 0.044                  | 0.0017      | -9.8                                        |
|                           | O2-H1...O                | 0.0155         | 0.061                  | 0.0015      | -16.0                                       |
| <b>ClS-1</b>              | C <sub>sp2</sub> -H...O2 | 0.0099         | 0.044                  | 0.0017      | -9.8                                        |
|                           | O2-H1...S                | 0.0127         | 0.037                  | 0.0007      | -10.4                                       |
| <b>ClSe-1</b>             | C <sub>sp2</sub> -H...O2 | 0.0115         | 0.048                  | 0.0018      | -11.0                                       |
|                           | O2-H1...Se               | 0.0117         | 0.033                  | 0.0007      | -8.8                                        |
| <b>ClTe-1</b>             | C <sub>sp2</sub> -H...O2 | 0.0113         | 0.046                  | 0.0017      | -10.7                                       |
|                           | O2-H1...Te               | 0.0105         | 0.026                  | 0.0005      | -7.2                                        |
| <b>BrO-1</b>              | C <sub>sp2</sub> -H...O2 | 0.0102         | 0.044                  | 0.0017      | -10.0                                       |
|                           | O2-H1...O                | 0.0145         | 0.057                  | 0.0015      | -14.9                                       |
| <b>BrS-1</b>              | C <sub>sp2</sub> -H...O2 | 0.0113         | 0.047                  | 0.0018      | -10.8                                       |
|                           | O2-H1...S                | 0.0126         | 0.037                  | 0.0007      | -10.3                                       |
| <b>BrSe-1</b>             | C <sub>sp2</sub> -H...O2 | 0.0113         | 0.047                  | 0.0018      | -10.8                                       |
|                           | O2-H1...Se               | 0.0117         | 0.033                  | 0.0008      | -8.8                                        |
| <b>BrTe-1</b>             | C <sub>sp2</sub> -H...O2 | 0.0113         | 0.046                  | 0.0017      | -10.6                                       |
|                           | O2-H1...Te               | 0.0106         | 0.026                  | 0.0005      | -7.2                                        |
| <b>CH<sub>3</sub>O-1</b>  | C <sub>sp2</sub> -H...O2 | -              | -                      | -           | -                                           |
|                           | O2-H1...O                | 0.0262         | 0.086                  | -0.0004     | -29.4                                       |
| <b>CH<sub>3</sub>S-1</b>  | C <sub>sp2</sub> -H...O2 | 0.0089         | 0.037                  | 0.0014      | -8.7                                        |
|                           | O2-H1...S                | 0.0176         | 0.045                  | -0.0002     | -15.2                                       |
| <b>CH<sub>3</sub>Se-1</b> | C <sub>sp2</sub> -H...O2 | 0.0085         | 0.035                  | 0.0018      | -6.7                                        |
|                           | O2-H1...Se               | 0.0159         | 0.043                  | -0.0011     | -17.3                                       |
| <b>CH<sub>3</sub>Te-1</b> | C <sub>sp2</sub> -H...O2 | 0.0086         | 0.036                  | 0.0013      | -8.2                                        |
|                           | O2-H1...Te               | 0.0130         | 0.029                  | 0.0003      | -9.0                                        |

**Table S2b** Electron density ( $\rho(r)$ ), Laplacian of electron density ( $\nabla^2\rho(r)$ ), total electron energy density ( $H(r)$ ) and individual energy of H-bond ( $E_{H\text{-bond}}$ ) at BCPs of intermolecular contacts in **XZ-2**

| Complex                   | H-bonds                  | $\rho(r)$ (au) | $\nabla^2\rho(r)$ (au) | $H(r)$ (au) | $E_{H\text{-bond}}$ (kJ.mol <sup>-1</sup> ) |
|---------------------------|--------------------------|----------------|------------------------|-------------|---------------------------------------------|
| <b>HO-2</b>               | C <sub>sp2</sub> -H...O5 | 0.0128         | 0.047                  | 0.0015      | -11.6                                       |
|                           | O2-H1...O                | 0.0296         | 0.090                  | -0.0017     | -34.1                                       |
|                           | O5-H4...O2               | 0.0299         | 0.095                  | -0.0015     | -35.0                                       |
| <b>HS-2</b>               | C <sub>sp2</sub> -H...O5 | 0.0145         | 0.052                  | 0.0014      | -13.5                                       |
|                           | O2-H1...S                | 0.0211         | 0.045                  | -0.0013     | -18.4                                       |
|                           | O5-H4...O2               | 0.0296         | 0.093                  | -0.0014     | -34.4                                       |
| <b>HSe-2</b>              | C <sub>sp2</sub> -H...O5 | 0.0145         | 0.052                  | 0.0013      | -13.5                                       |
|                           | O2-H1...Se               | 0.0188         | 0.039                  | -0.0008     | -14.8                                       |
|                           | O5-H4...O2               | 0.0294         | 0.093                  | -0.0014     | -34.1                                       |
| <b>HTe-2</b>              | C <sub>sp2</sub> -H...O5 | 0.0134         | 0.051                  | 0.0017      | -12.1                                       |
|                           | O2-H1...Te               | 0.0160         | 0.030                  | -0.0004     | -10.9                                       |
|                           | O5-H4...O2               | 0.0271         | 0.091                  | -0.0012     | -33.2                                       |
| <b>FO-2</b>               | C <sub>sp2</sub> -H...O5 | 0.0166         | 0.064                  | 0.0020      | -15.8                                       |
|                           | O2-H1...O                | 0.0228         | 0.081                  | 0.0007      | -24.7                                       |
|                           | O5-H4...O2               | 0.0291         | 0.095                  | -0.0011     | -34.0                                       |
| <b>FS-2</b>               | C <sub>sp2</sub> -H...O5 | 0.0176         | 0.065                  | 0.0015      | -17.1                                       |
|                           | O2-H1...S                | 0.0179         | 0.043                  | -0.0004     | -15.0                                       |
|                           | O5-H4...O2               | 0.0292         | 0.094                  | -0.0012     | -33.9                                       |
| <b>FSe-2</b>              | C <sub>sp2</sub> -H...O5 | 0.0178         | 0.064                  | 0.0015      | -17.2                                       |
|                           | O2-H1...Se               | 0.0166         | 0.037                  | -0.0002     | -12.7                                       |
|                           | O5-H4...O2               | 0.0294         | 0.093                  | -0.0013     | -34.1                                       |
| <b>FTe-2</b>              | C <sub>sp2</sub> -H...O5 | 0.0172         | 0.062                  | 0.0014      | -16.5                                       |
|                           | O2-H1...Te               | 0.0148         | 0.030                  | -0.0001     | -9.9                                        |
|                           | O5-H4...O2               | 0.0292         | 0.092                  | -0.0013     | -33.8                                       |
| <b>ClO-2</b>              | C <sub>sp2</sub> -H...O5 | 0.0173         | 0.065                  | 0.0018      | -16.5                                       |
|                           | O2-H1...O                | 0.0226         | 0.079                  | 0.0006      | -24.4                                       |
|                           | O5-H4...O2               | 0.0289         | 0.094                  | -0.0010     | -33.6                                       |
| <b>CIS-2</b>              | C <sub>sp2</sub> -H...O5 | 0.0187         | 0.067                  | 0.0014      | -18.3                                       |
|                           | O2-H1...S                | 0.0185         | 0.043                  | -0.0005     | -15.6                                       |
|                           | O5-H4...O2               | 0.0293         | 0.094                  | -0.0012     | -34.0                                       |
| <b>ClSe-2</b>             | C <sub>sp2</sub> -H...O5 | 0.0186         | 0.066                  | 0.0013      | -18.1                                       |
|                           | O2-H1...Se               | 0.0171         | 0.037                  | -0.0003     | -13.1                                       |
|                           | O5-H4...O2               | 0.0295         | 0.094                  | -0.0013     | -34.2                                       |
| <b>ClTe-2</b>             | C <sub>sp2</sub> -H...O5 | 0.0180         | 0.063                  | 0.0013      | -17.4                                       |
|                           | O2-H1...Te               | 0.0150         | 0.030                  | -0.0001     | -10.0                                       |
|                           | O5-H4...O2               | 0.0291         | 0.092                  | -0.0013     | -33.7                                       |
| <b>BrO-2</b>              | C <sub>sp2</sub> -H...O5 | 0.0178         | 0.066                  | 0.0018      | -17.0                                       |
|                           | O2-H1...O                | 0.0216         | 0.077                  | 0.0009      | -22.9                                       |
|                           | O5-H4...O2               | 0.0288         | 0.094                  | -0.0010     | -33.4                                       |
| <b>BrS-2</b>              | C <sub>sp2</sub> -H...O5 | 0.0188         | 0.067                  | 0.0013      | -18.4                                       |
|                           | O2-H1...S                | 0.0182         | 0.043                  | -0.0005     | -15.3                                       |
|                           | O5-H4...O2               | 0.0292         | 0.094                  | -0.0012     | -33.8                                       |
| <b>BrSe-2</b>             | C <sub>sp2</sub> -H...O5 | 0.0187         | 0.066                  | 0.0013      | -18.2                                       |
|                           | O2-H1...Se               | 0.0169         | 0.037                  | -0.0003     | -13.0                                       |
|                           | O5-H4...O2               | 0.0294         | 0.093                  | -0.0013     | -34.1                                       |
| <b>BrTe-2</b>             | C <sub>sp2</sub> -H...O5 | 0.0182         | 0.064                  | 0.0013      | -17.5                                       |
|                           | O2-H1...Te               | 0.0150         | 0.030                  | -0.0001     | -10.0                                       |
|                           | O5-H4...O2               | 0.0291         | 0.092                  | -0.0013     | -33.6                                       |
| <b>CH<sub>3</sub>O-2</b>  | C <sub>sp2</sub> -H...O5 | 0.0122         | 0.044                  | 0.0013      | -10.9                                       |
|                           | O2-H1...O                | 0.0324         | 0.093                  | -0.0029     | -38.4                                       |
|                           | O5-H4...O2               | 0.0304         | 0.095                  | -0.0017     | -35.8                                       |
| <b>CH<sub>3</sub>S-2</b>  | C <sub>sp2</sub> -H...O5 | 0.0141         | 0.050                  | 0.0013      | -13.1                                       |
|                           | O2-H1...S                | 0.0221         | 0.046                  | -0.0017     | -19.5                                       |
|                           | O5-H4...O2               | 0.0301         | 0.094                  | -0.0016     | -35.1                                       |
| <b>CH<sub>3</sub>Se-2</b> | C <sub>sp2</sub> -H...O5 | 0.0142         | 0.050                  | 0.0013      | -13.2                                       |
|                           | O2-H1...Se               | 0.0196         | 0.039                  | -0.0010     | -15.6                                       |
|                           | O5-H4...O2               | 0.0299         | 0.093                  | -0.0016     | -34.8                                       |
| <b>CH<sub>3</sub>Te-2</b> | C <sub>sp2</sub> -H...O5 | 0.0139         | 0.049                  | 0.0012      | -12.8                                       |
|                           | O2-H1...Te               | 0.0166         | 0.031                  | -0.0005     | -11.4                                       |
|                           | O5-H4...O2               | 0.0294         | 0.092                  | -0.0015     | -33.9                                       |

**Table S2c** Electron density ( $\rho(r)$ ), Laplacian of electron density ( $\nabla^2\rho(r)$ ), total electron energy density ( $H(r)$ ) and individual energy of H-bond ( $E_{\text{H-bond}}$ ) at BCPs of intermolecular contacts in **XZ-3**

| Complex       | H-bonds                  | $\rho(r)$ (au) | $\nabla^2\rho(r)$ (au) | $H(r)$ (au) | $E_{\text{H-bond}}$ (kJ.mol <sup>-1</sup> ) |
|---------------|--------------------------|----------------|------------------------|-------------|---------------------------------------------|
| <b>HO-3</b>   | C <sub>sp2</sub> -H...O8 | 0.0155         | 0.056                  | 0.0015      | -14.5                                       |
|               | O2-H1...O                | 0.0323         | 0.093                  | -0.0030     | -38.5                                       |
|               | O5-H4...O2               | 0.0360         | 0.103                  | -0.0043     | -45.0                                       |
|               | O8-H7...O5               | 0.0339         | 0.098                  | -0.0034     | -41.1                                       |
| <b>HS-3</b>   | C <sub>sp2</sub> -H...O8 | 0.0164         | 0.059                  | 0.0015      | -15.6                                       |
|               | O2-H1...S                | 0.0224         | 0.046                  | -0.0018     | -19.7                                       |
|               | O5-H4...O2               | 0.0348         | 0.101                  | -0.0038     | -42.9                                       |
|               | O8-H7...O5               | 0.0336         | 0.098                  | -0.0032     | -40.7                                       |
| <b>HSe-3</b>  | C <sub>sp2</sub> -H...O8 | 0.0164         | 0.059                  | 0.0015      | -15.6                                       |
|               | O2-H1...Se               | 0.0199         | 0.039                  | -0.0012     | -15.9                                       |
|               | O5-H4...O2               | 0.0345         | 0.100                  | -0.0036     | -42.4                                       |
|               | O8-H7...O5               | 0.0334         | 0.098                  | -0.0031     | -40.4                                       |
| <b>HTe-3</b>  | C <sub>sp2</sub> -H...O8 | 0.0162         | 0.059                  | 0.0015      | -15.4                                       |
|               | O2-H1...Te               | 0.0171         | 0.031                  | -0.0006     | -11.7                                       |
|               | O5-H4...O2               | 0.0340         | 0.100                  | -0.0034     | -41.7                                       |
|               | O8-H7...O5               | 0.0329         | 0.095                  | -0.0021     | -36.5                                       |
| <b>FO-3</b>   | C <sub>sp2</sub> -H...O8 | 0.0208         | 0.076                  | 0.0015      | -21.1                                       |
|               | O2-H1...O                | 0.0258         | 0.088                  | -0.0002     | -29.3                                       |
|               | O5-H4...O2               | 0.0349         | 0.102                  | -0.0037     | -43.2                                       |
|               | O8-H7...O5               | 0.0351         | 0.100                  | -0.0039     | -43.0                                       |
| <b>FS-3</b>   | C <sub>sp2</sub> -H...O8 | 0.0206         | 0.075                  | 0.0014      | -20.8                                       |
|               | O2-H1...S                | 0.0194         | 0.044                  | -0.0008     | -16.6                                       |
|               | O5-H4...O2               | 0.0341         | 0.100                  | -0.0034     | -41.8                                       |
|               | O8-H7...O5               | 0.0345         | 0.099                  | -0.0036     | -42.1                                       |
| <b>FSe-3</b>  | C <sub>sp2</sub> -H...O8 | 0.0204         | 0.074                  | 0.0014      | -20.6                                       |
|               | O2-H1...Se               | 0.0179         | 0.038                  | -0.0006     | -14.0                                       |
|               | O5-H4...O2               | 0.0341         | 0.100                  | -0.0034     | -41.8                                       |
|               | O8-H7...O5               | 0.0344         | 0.099                  | -0.0036     | -42.0                                       |
| <b>FTe-3</b>  | C <sub>sp2</sub> -H...O8 | 0.0198         | 0.072                  | 0.0014      | -19.8                                       |
|               | O2-H1...Te               | 0.0159         | 0.030                  | -0.0003     | -10.8                                       |
|               | O5-H4...O2               | 0.0339         | 0.099                  | -0.0034     | -41.3                                       |
|               | O8-H7...O5               | 0.0340         | 0.099                  | -0.0034     | -41.4                                       |
| <b>CIO-3</b>  | C <sub>sp2</sub> -H...O8 | 0.0218         | 0.078                  | 0.0013      | -22.3                                       |
|               | O2-H1...O                | 0.0256         | 0.086                  | -0.0002     | -28.9                                       |
|               | O5-H4...O2               | 0.0345         | 0.101                  | -0.0036     | -42.7                                       |
|               | O8-H7...O5               | 0.0350         | 0.099                  | -0.0039     | -42.9                                       |
| <b>CIS-3</b>  | C <sub>sp2</sub> -H...O8 | 0.0216         | 0.077                  | 0.0012      | -22.1                                       |
|               | O2-H1...S                | 0.0200         | 0.044                  | -0.0010     | -17.2                                       |
|               | O5-H4...O2               | 0.0342         | 0.100                  | -0.0035     | -42.0                                       |
|               | O8-H7...O5               | 0.0345         | 0.099                  | -0.0036     | -42.2                                       |
| <b>ClSe-3</b> | C <sub>sp2</sub> -H...O8 | 0.0213         | 0.076                  | 0.0012      | -21.6                                       |
|               | O2-H1...Se               | 0.0184         | 0.038                  | -0.0007     | -14.4                                       |
|               | O5-H4...O2               | 0.0342         | 0.100                  | -0.0035     | -41.9                                       |
|               | O8-H7...O5               | 0.0344         | 0.099                  | -0.0036     | -42.0                                       |
| <b>CITe-3</b> | C <sub>sp2</sub> -H...O8 | 0.0206         | 0.073                  | 0.0013      | -20.7                                       |
|               | O2-H1...Te               | 0.0162         | 0.030                  | -0.0004     | -10.9                                       |
|               | O5-H4...O2               | 0.0339         | 0.099                  | -0.0034     | -41.3                                       |
|               | O8-H7...O5               | 0.0340         | 0.099                  | -0.0034     | -41.3                                       |
| <b>BrO-3</b>  | C <sub>sp2</sub> -H...O8 | 0.0227         | 0.080                  | 0.0011      | -23.3                                       |
|               | O2-H1...O                | 0.0246         | 0.084                  | 0.0001      | -27.3                                       |
|               | O5-H4...O2               | 0.0342         | 0.101                  | -0.0034     | -42.1                                       |
|               | O8-H7...O5               | 0.0350         | 0.100                  | -0.0039     | -42.9                                       |
| <b>BrS-3</b>  | C <sub>sp2</sub> -H...O8 | 0.0219         | 0.077                  | 0.0011      | -22.4                                       |
|               | O2-H1...S                | 0.0199         | 0.044                  | -0.0010     | -17.0                                       |
|               | O5-H4...O2               | 0.0341         | 0.100                  | -0.0034     | -41.8                                       |
|               | O8-H7...O5               | 0.0345         | 0.099                  | -0.0036     | -42.1                                       |
| <b>BrSe-3</b> | C <sub>sp2</sub> -H...O8 | 0.0214         | 0.076                  | 0.0012      | -21.8                                       |
|               | O2-H1...Se               | 0.0183         | 0.038                  | -0.0007     | -14.3                                       |
|               | O5-H4...O2               | 0.0341         | 0.100                  | -0.0034     | -41.7                                       |
|               | O8-H7...O5               | 0.0343         | 0.099                  | -0.0035     | -41.9                                       |

Table S2c Continued

| Complex              | H-bonds                  | $\rho(r)$ (au) | $\nabla^2\rho(r)$ (au) | H(r) (au) | $E_{\text{H-bond}}$ (kJ.mol <sup>-1</sup> ) |
|----------------------|--------------------------|----------------|------------------------|-----------|---------------------------------------------|
| BrTe-3               | C <sub>sp2</sub> -H...O8 | 0.0209         | 0.074                  | 0.0013    | -21.0                                       |
|                      | O2-H1...Te               | 0.0161         | 0.030                  | -0.0004   | -10.9                                       |
|                      | O5-H4...O2               | 0.0338         | 0.099                  | -0.0033   | -41.2                                       |
|                      | O8-H7...O5               | 0.0339         | 0.099                  | -0.0043   | -41.2                                       |
| CH <sub>3</sub> O-3  | C <sub>sp2</sub> -H...O8 | 0.0142         | 0.051                  | 0.0014    | -13.1                                       |
|                      | O2-H1...O                | 0.0361         | 0.097                  | -0.0047   | -44.2                                       |
|                      | O5-H4...O2               | 0.0366         | 0.103                  | -0.0046   | -45.9                                       |
|                      | O8-H7...O5               | 0.0336         | 0.098                  | -0.0032   | -40.7                                       |
| CH <sub>3</sub> S-3  | C <sub>sp2</sub> -H...O8 | 0.0102         | 0.037                  | 0.0012    | -9.0                                        |
|                      | O2-H1...S                | 0.0247         | 0.048                  | -0.0026   | -22.6                                       |
|                      | O5-H4...O2               | 0.0343         | 0.101                  | -0.0035   | -42.4                                       |
|                      | O8-H7...O5               | 0.0325         | 0.098                  | -0.0027   | -39.2                                       |
| CH <sub>3</sub> Se-3 | C <sub>sp2</sub> -H...O8 | 0.0100         | 0.036                  | 0.0011    | -8.8                                        |
|                      | O2-H1...Se               | 0.0218         | 0.041                  | -0.0018   | -18.1                                       |
|                      | O5-H4...O2               | 0.0341         | 0.100                  | -0.0034   | -41.9                                       |
|                      | O8-H7...O5               | 0.0324         | 0.098                  | -0.0026   | -39.0                                       |
| CH <sub>3</sub> Te-3 | C <sub>sp2</sub> -H...O8 | 0.0099         | 0.035                  | 0.0011    | -8.7                                        |
|                      | O2-H1...Te               | 0.0183         | 0.032                  | -0.0009   | -12.9                                       |
|                      | O5-H4...O2               | 0.0335         | 0.099                  | -0.0032   | -40.9                                       |
|                      | O8-H7...O5               | 0.0320         | 0.097                  | -0.0025   | -38.5                                       |

Table S3 Concise summary of interaction energies of (H<sub>2</sub>O)<sub>n</sub> systems, with n=2, 3, 4 (kJ.mol<sup>-1</sup>)

| Complexes                       | Level of theory                                | Interaction energy (kJ.mol <sup>-1</sup> ) | Source    |
|---------------------------------|------------------------------------------------|--------------------------------------------|-----------|
| (H <sub>2</sub> O) <sub>2</sub> | MP2/aug-cc-pVDZ                                | -18.5 <sup>a</sup>                         | [1]       |
|                                 | MP2/aug-cc-pVDZ                                | -19.4 <sup>a</sup>                         | [1]       |
|                                 | CCSD(T)/aug-cc-pVTZ//MP2/aug-cc-pVTZ           | -11.3 <sup>b</sup> , -20.0 <sup>a</sup>    | This work |
|                                 | CCSDT/6-311++G(3df,2pd)//MP2/6-311++G(3df,2pd) | -10.4 <sup>b</sup> , -19.3 <sup>a</sup>    | This work |
|                                 | Experiment                                     | -22.6 ± 2.9                                | [2]       |
| (H <sub>2</sub> O) <sub>3</sub> | MP4SDQ/6-31+G(2d,2p)                           | -45.1 <sup>b</sup>                         | [3]       |
|                                 | CCSD(T)/aug-cc-pVTZ//MP2/aug-cc-pVTZ           | -41.6 <sup>b</sup> , -64.2 <sup>a</sup>    | This work |
|                                 | CCSDT/6-311++G(3df,2pd)//MP2/6-311++G(3df,2pd) | -39.2 <sup>b</sup> , -61.6 <sup>a</sup>    | This work |
| (H <sub>2</sub> O) <sub>4</sub> | MP2/6-31+G(d,p)                                | -117.9 <sup>a</sup>                        | [4]       |
|                                 | MP2/6-311+G(2d,2p)                             | -102.5 <sup>a</sup>                        | [4]       |
|                                 | CCSD(T)/aug-cc-pVTZ//MP2/aug-cc-pVTZ           | -79.2 <sup>b</sup> , -113.7 <sup>a</sup>   | This work |
|                                 | CCSDT/6-311++G(3df,2pd)//MP2/6-311++G(3df,2pd) | -74.1 <sup>b</sup> , -108.7 <sup>a</sup>   | This work |

<sup>a</sup> Corrected by only BSSE  
<sup>b</sup> Corrected by both ZPE and BSSE

[1] S. S. Xantheas and T. H. Dunning Jr, *J. Chem. Phys.*, 1993, **99**, 8774-8792.

[2] L. A. Curtiss, D. J. Frurip, and M. Blander, *J. Chem. Phys.*, 1979, **71**, 2703.

[3] O. Mo, M. Yanez, and J. Elguero, *J. Chem. Phys.*, 1992, **97**, 6628.

[4] M. Masella, N. Gresh and J. P. Flament, *J. Chem. Soc. Faraday Trans*, 1998, **94**, 2745-2753.

**Table S4.** Changes of H-bond lengths ( $\Delta r$ , in mÅ) and their corresponding stretching frequencies ( $\Delta \nu$ , in  $\text{cm}^{-1}$ ) in complexes at MP2/6-311++G(3df,2dp)

|                                               | <b>HO-1</b>  | <b>FO-1</b>  | <b>ClO-1</b>  | <b>BrO-1</b>  | <b>CH<sub>3</sub>O-1</b>  | <b>HS-1</b>  | <b>FS-1</b>  | <b>CIS-1</b>  | <b>BrS-1</b>  | <b>CH<sub>3</sub>S-1</b>  |
|-----------------------------------------------|--------------|--------------|---------------|---------------|---------------------------|--------------|--------------|---------------|---------------|---------------------------|
| $\Delta r(\text{C}_{\text{sp}^2}\text{-H})$   | -2.9         | -1.3         | -1.3          | -1.2          | -3.5                      | -0.3         | -0.3         | 0.2           | 0.4           | -0.7                      |
| $\Delta r(\text{O2-H1})$                      | 7.4          | 3.7          | 3.8           | 3.4           | 9.0                       | 6.8          | 4.1          | 4.6           | 4.5           | 7.8                       |
| $\Delta \nu(\text{C}_{\text{sp}^2}\text{-H})$ | 45.8         | 24.4         | 27.3          | 28.1          | 49.4                      | 15.6         | 13.9         | 11.5          | 9.7           | 19.9                      |
| $\Delta \nu(\text{O2-H1})$                    | -147.5       | -66.2        | -68.3         | -60.0         | -181.7                    | -141.5       | -81.2        | -91.8         | -89.6         | -163.3                    |
|                                               | <b>HSe-1</b> | <b>FSe-1</b> | <b>ClSe-1</b> | <b>BrSe-1</b> | <b>CH<sub>3</sub>Se-1</b> | <b>HTe-1</b> | <b>FTe-1</b> | <b>CITe-1</b> | <b>BrTe-1</b> | <b>CH<sub>3</sub>Te-1</b> |
| $\Delta r(\text{C}_{\text{sp}^2}\text{-H})$   | 0            | 0            | 0.4           | 0.5           | -0.4                      | 0.4          | 0.1          | 0.4           | 0.6           | -0.1                      |
| $\Delta r(\text{O2-H1})$                      | 6.4          | 4.4          | 4.8           | 4.7           | 7.3                       | 5.7          | 4.4          | 4.7           | 4.7           | 6.6                       |
| $\Delta \nu(\text{C}_{\text{sp}^2}\text{-H})$ | 10.1         | 10.8         | 7.5           | 6.5           | 15.4                      | 4.6          | 9.3          | 6.4           | 4.6           | 11.5                      |
| $\Delta \nu(\text{O2-H1})$                    | -134.7       | -87.6        | -96.9         | -95.6         | -153.8                    | -121.2       | -90.3        | -95.5         | -96.0         | -139.0                    |
|                                               | <b>HO-2</b>  | <b>FO-2</b>  | <b>ClO-2</b>  | <b>BrO-2</b>  | <b>CH<sub>3</sub>O-2</b>  | <b>HS-2</b>  | <b>FS-2</b>  | <b>CIS-2</b>  | <b>BrS-2</b>  | <b>CH<sub>3</sub>S-2</b>  |
| $\Delta r(\text{C}_{\text{sp}^2}\text{-H})$   | -4.6         | 0.1          | -0.1          | 0.3           | -5.9                      | 0.6          | 2.1          | 2.7           | 3.1           | -0.9                      |
| $\Delta r(\text{O2-H1})$                      | 13.1         | 8.8          | 8.7           | 8.2           | 15.4                      | 12.2         | 9.5          | 10.1          | 10.0          | 13.4                      |
| $\Delta r(\text{O5-H4})$                      | 12.6         | 12.3         | 12.1          | 12.0          | 13.2                      | 12.2         | 11.9         | 12.0          | 11.9          | 12.7                      |
| $\Delta \nu(\text{C}_{\text{sp}^2}\text{-H})$ | 72.8         | 11.3         | 17.7          | 14.5          | 86.4                      | 7.9          | -15.4        | -20.8         | -25.3         | 27.7                      |
| $\Delta \nu(\text{O2-H1})$                    | -255.7       | -159.9       | -161.4        | -150.6        | -303.0                    | -247.8       | -188.9       | -203.3        | -200.6        | -273.0                    |
| $\Delta \nu(\text{O5-H4})$                    | -249.7       | -240.6       | -237.2        | -234.0        | -260.4                    | -240.8       | -234.3       | -237.1        | -235.1        | -250.8                    |
|                                               | <b>HSe-2</b> | <b>FSe-2</b> | <b>ClSe-2</b> | <b>BrSe-2</b> | <b>CH<sub>3</sub>Se-2</b> | <b>HTe-2</b> | <b>FTe-2</b> | <b>CITe-2</b> | <b>BrTe-2</b> | <b>CH<sub>3</sub>Te-2</b> |
| $\Delta r(\text{C}_{\text{sp}^2}\text{-H})$   | 1.3          | 2.5          | 3.1           | 3.4           | -0.1                      | 5.4          | 2.4          | 3.0           | 3.3           | 0.5                       |
| $\Delta r(\text{O2-H1})$                      | 11.6         | 9.7          | 10.3          | 10.2          | 12.7                      | 9.7          | 9.7          | 10.0          | 10.0          | 11.8                      |
| $\Delta r(\text{O5-H4})$                      | 12.0         | 12.0         | 12.1          | 12.0          | 12.5                      | 12.0         | 12.0         | 11.9          | 11.9          | 12.2                      |
| $\Delta \nu(\text{C}_{\text{sp}^2}\text{-H})$ | -4.2         | -20.9        | -27.1         | -30.9         | 16.4                      | -13.7        | -20.5        | -27.6         | -32.0         | 7.5                       |
| $\Delta \nu(\text{O2-H1})$                    | -237.2       | -195.4       | -207.6        | -205.9        | -259.2                    | -221.5       | -195.5       | -202.9        | -201.8        | -239.4                    |
| $\Delta \nu(\text{O5-H4})$                    | -238.0       | -237.4       | -239.0        | -237.6        | -248.1                    | -230.8       | -236.5       | -235.9        | -235.0        | -241.1                    |
|                                               | <b>HO-3</b>  | <b>FO-3</b>  | <b>ClO-3</b>  | <b>BrO-3</b>  | <b>CH<sub>3</sub>O-3</b>  | <b>HS-3</b>  | <b>FS-3</b>  | <b>CIS-3</b>  | <b>BrS-3</b>  | <b>CH<sub>3</sub>S-3</b>  |
| $\Delta r(\text{C}_{\text{sp}^2}\text{-H})$   | -5.0         | 1.9          | 1.6           | 2.3           | -7.4                      | 0.6          | 2.9          | 3.5           | 3.9           | -3.1                      |
| $\Delta r(\text{O2-H1})$                      | 14.9         | 10.1         | 10.1          | 9.5           | 17.9                      | 13.4         | 10.6         | 11.3          | 11.2          | 15.3                      |
| $\Delta r(\text{O5-H4})$                      | 17.4         | 16.5         | 16.3          | 16.0          | 18.0                      | 16.3         | 15.7         | 15.8          | 15.7          | 15.9                      |
| $\Delta r(\text{O8-H7})$                      | 15.9         | 16.9         | 16.8          | 16.8          | 15.8                      | 15.3         | 16.0         | 16.0          | 16.0          | 14.7                      |
| $\Delta \nu(\text{C}_{\text{sp}^2}\text{-H})$ | 80.1         | -14.3        | -7.1          | -15.9         | 109.0                     | 8.7          | -27.3        | -32.1         | -38.5         | 51.6                      |
| $\Delta \nu(\text{O2-H1})$                    | -294.6       | -190.2       | -191.7        | -180.5        | -358.2                    | -274.9       | -213.0       | -228.7        | -227.6        | -317.0                    |
| $\Delta \nu(\text{O5-H4})$                    | -341.6       | -322.7       | -317.8        | -312.1        | -354.2                    | -319.6       | -307.2       | -309.8        | -307.8        | -313.1                    |
| $\Delta \nu(\text{O8-H7})$                    | -315.2       | -346.5       | -344.9        | -334.6        | -311.3                    | -304.4       | -329.6       | -330.7        | -318.7        | -289.5                    |
|                                               | <b>HSe-3</b> | <b>FSe-3</b> | <b>ClSe-3</b> | <b>BrSe-3</b> | <b>CH<sub>3</sub>Se-3</b> | <b>HTe-3</b> | <b>FTe-3</b> | <b>CITe-3</b> | <b>BrTe-3</b> | <b>CH<sub>3</sub>Te-3</b> |
| $\Delta r(\text{C}_{\text{sp}^2}\text{-H})$   | 1.5          | 3.2          | 3.7           | 4.1           | -2.5                      | 2.3          | 3.0          | 3.6           | 4.0           | -2.1                      |
| $\Delta r(\text{O2-H1})$                      | 12.8         | 10.8         | 11.4          | 11.3          | 14.3                      | 12.1         | 10.8         | 11.2          | 11.1          | 13.1                      |
| $\Delta r(\text{O5-H4})$                      | 16.0         | 15.7         | 15.8          | 15.7          | 15.7                      | 15.6         | 15.5         | 15.5          | 15.5          | 15.3                      |
| $\Delta r(\text{O8-H7})$                      | 15.1         | 15.9         | 15.9          | 15.8          | 14.5                      | 14.8         | 15.5         | 15.5          | 15.5          | 14.1                      |
| $\Delta \nu(\text{C}_{\text{sp}^2}\text{-H})$ | -5.6         | -31.5        | -37.0         | -42.0         | 43.3                      | -16.6        | -28.1        | -35.7         | -41.3         | 37.8                      |
| $\Delta \nu(\text{O2-H1})$                    | -262.9       | -219.1       | -231.8        | -230.7        | -298.0                    | -248.2       | -219.2       | -227.5        | -227.1        | -280.7                    |
| $\Delta \nu(\text{O5-H4})$                    | -314.9       | -307.8       | -309.9        | -307.7        | -298.7                    | -307.6       | -305.3       | -306.0        | -304.7        | -300.0                    |
| $\Delta \nu(\text{O8-H7})$                    | -300.3       | -327.9       | -328.0        | -315.4        | -284.7                    | -292.9       | -309.8       | -309.8        | -309.1        | -276.7                    |

**Table S5.** NBO charges of Z atoms (Z = O, S, Se, Te) in monomers at  $\omega$ B97XD/6-311++G(3df,2pd)

|         |              |              |               |               |                           |
|---------|--------------|--------------|---------------|---------------|---------------------------|
|         | <b>HCHO</b>  | <b>FCHO</b>  | <b>ClCHO</b>  | <b>BrCHO</b>  | <b>CH<sub>3</sub>CHO</b>  |
| q(O)/e  | -0.514       | -0.493       | -0.455        | -0.445        | -0.506                    |
|         | <b>HCHS</b>  | <b>FCHS</b>  | <b>ClCHS</b>  | <b>BrCHS</b>  | <b>CH<sub>3</sub>CHS</b>  |
| q(S)/e  | 0.114        | 0.075        | 0.156         | 0.177         | 0.089                     |
|         | <b>HCHSe</b> | <b>FCHSe</b> | <b>ClCHSe</b> | <b>BrCHSe</b> | <b>CH<sub>3</sub>CHSe</b> |
| q(Se)/e | 0.202        | 0.148        | 0.238         | 0.261         | 0.175                     |
|         | <b>HCHTe</b> | <b>FCHTe</b> | <b>ClCHTe</b> | <b>BrCHTe</b> | <b>CH<sub>3</sub>CHTe</b> |
| q(Te)/e | 0.290        | 0.211        | 0.309         | 0.337         | 0.234                     |

**Table S6.** Concise summary of stretching frequency changes of C<sub>sp</sub>-H, C<sub>sp2</sub>-H and C<sub>sp3</sub>-H bonds involving hydrogen bond

| Complexes                                                                                                                                                                                     | Level of theory/ Experiment | $\Delta\nu(\text{C}_{\text{sp}3}\text{-H})$ (cm <sup>-1</sup> ) | Source    |
|-----------------------------------------------------------------------------------------------------------------------------------------------------------------------------------------------|-----------------------------|-----------------------------------------------------------------|-----------|
| C <sub>2</sub> HX...C <sub>6</sub> H <sub>6</sub><br>(X = H, F, Cl, Br, CH <sub>3</sub> , NH <sub>2</sub> )                                                                                   | MP2/aug-cc-pVDZ             | 15.7 ÷ 24.9                                                     | [5]       |
| CH <sub>3</sub> CN/CH <sub>3</sub> NC...H <sub>2</sub> O                                                                                                                                      | B3LYP/ aug-cc-pVTZ          | 5-14                                                            | [6]       |
| CHX <sub>3</sub> ...NH <sub>2</sub> Y<br>(X=F, Cl; Y=H, F, Cl, Br)                                                                                                                            | MP2/6-311++G(d,p)           | 9.4 ÷ 36.3                                                      | [7]       |
| DMSO ... CO <sub>2</sub>                                                                                                                                                                      | MP2/6-311++G(2d,2p)         | 35                                                              |           |
| DMSO...1H <sub>2</sub> O                                                                                                                                                                      |                             | 29.7                                                            |           |
| DMSO...2H <sub>2</sub> O (has water bridge O-H...O)                                                                                                                                           |                             | 33.2                                                            | [8]       |
| DMSO...2H <sub>2</sub> O (no water bridge O-H...O)                                                                                                                                            |                             | 25.7                                                            |           |
| Cl <sub>3</sub> CH...NCCH <sub>3</sub>                                                                                                                                                        | Exp.                        | 8.7                                                             | [9]       |
| F <sub>3</sub> CH...ammonia                                                                                                                                                                   | Exp.                        | 7.6                                                             |           |
| F <sub>3</sub> CH...pyridine                                                                                                                                                                  |                             | 3                                                               | [10]      |
| F <sub>3</sub> CH...OH <sub>2</sub>                                                                                                                                                           | Exp.                        | 20.3                                                            |           |
|                                                                                                                                                                                               | MP2/6-311++G(d,p)           | 39.4                                                            | [11]      |
| Complexes                                                                                                                                                                                     | Level of theory/ Experiment | $\Delta\nu(\text{C}_{\text{sp}2}\text{-H})$ (cm <sup>-1</sup> ) | Source    |
| RCHZ...HCOOH<br>(R= H, F, Cl, Br, CH <sub>3</sub> , NH <sub>2</sub> ; Z= O, S)                                                                                                                | MP2/aug-cc-pVDZ             | 81÷96                                                           | [12]      |
| CH <sub>3</sub> CHO...1H <sub>2</sub> O                                                                                                                                                       | B3LYP/6-311++G(d,p)         | 52                                                              |           |
| CH <sub>3</sub> CHO...2H <sub>2</sub> O                                                                                                                                                       |                             | 93                                                              | [13]      |
| HCHO...1H <sub>2</sub> O                                                                                                                                                                      | B3LYP/6-311++G(d,p)         | 45                                                              |           |
| HCHO...2H <sub>2</sub> O                                                                                                                                                                      |                             | 66                                                              | [14]      |
| CH <sub>3</sub> CHZ...1H <sub>2</sub> O (Z=O, S, Se, Te)                                                                                                                                      | MP2/6-311++G(3df,2dp)       | 11.5 ÷ 49.4                                                     |           |
| CH <sub>3</sub> CHZ...2H <sub>2</sub> O                                                                                                                                                       |                             | 7.5 ÷ 86.4                                                      | This work |
| CH <sub>3</sub> CHZ...3H <sub>2</sub> O                                                                                                                                                       |                             | 37.8 ÷ 109.0                                                    |           |
| BIM(benzimidazole)...2H <sub>2</sub> O                                                                                                                                                        | Exp.                        | 14                                                              |           |
| MBIM(N-methylbenzimidazole)...4H <sub>2</sub> O                                                                                                                                               | Exp.                        | 14                                                              | [15]      |
| Complexes                                                                                                                                                                                     | Level of theory/ Experiment | $\Delta\nu(\text{C}_{\text{sp}}\text{-H})$ (cm <sup>-1</sup> )  | Source    |
| RCHO...HCN                                                                                                                                                                                    | MP2/aug-cc-pVDZ             | -56.7 ÷ -107.8                                                  | [16]      |
| RCCH...NH <sub>3</sub> (R= H, F, Cl, CH <sub>3</sub> , CH <sub>2</sub> F, CHF <sub>2</sub> , CF <sub>3</sub> , CH <sub>2</sub> Cl, CHCl <sub>2</sub> , CCl <sub>3</sub> , CN, HCC, FCC, CICC) | B3LYP/6-31(d,p)             | -193 ÷ -324                                                     | [17]      |
| (o-Chlorobenzoacetylen) <sub>3</sub>                                                                                                                                                          | Exp.                        | -69                                                             | [18]      |
| (2-ethynyladamantan-2-ol)                                                                                                                                                                     | Exp.                        | -130                                                            | [19]      |

[5] P. N. Khanh, V. T. Ngan, N. T. H. Man, N. T. A. Nhung, A. K. Chandra and N.T. Trung, *RSC Adv.*, 2016, **6**, 106662-106670.

[6] D. L. Cao, X. Q. Feng, J. L. Wang, Y. X. Li, Z. Y. Hu and S. S. Chen, *J. Mol. Struct.: THEOCHEM*, 2008, **849**, 76-83.

[7] N.T.H. Man, P. L. Nhan, V. Vien, D.T. Quang and N. T. Trung, *Int. J. Quantum Chem*, 2017, **117**, e25338.

[8] P. N. Khanh, P. D. Cam-Tu, H. Q. Dai, V. Q. Van, V. T. Ngan, M. T. Nguyen and N. T. Trung, *J. Comput. Chem.*, 2019, **140**, 464-474.

[9] B.Behera and P. K. Das, *J. Phys. Chem. A*, 2019, **123**, 1830-1839.

[10] W. A. Herrebout, S. M. Melikova, S. N. Delanoye, K. S. Rutkowski, D. N. Shchepkin and B. J. van der Veken, *J. Phys. Chem. A*, 2005, **109**, 3038-3044.

[11] R. Gopi, N. Ramanathan and K. Sundararajan, *Chem. Phys.*, 2016, **476**, 36-45.

[12] N. T. Trung, P. N. Khanh, A. J. P. Carvalho and M. T. Nguyen, *J. Comput. Chem.*, 2019, **40**, 1387-1400.

[13] A. K. Chandra and T. Zeegers-Huyskens, *J. At. Mol. Phys.*, 2012, **2012**.

[14] A. K. Chandra, T. Zeegers-Huyskens, *J. Comput. Chem.*, 2012, **33**, 1131-1141.

[15] A. Bhattacharjee and S. Wategaonkar, *Phys. Chem. Chem. Phys.*, 2016, **18**, 27745-27749.

[16] N. N. Tri, N. T. H. Man, N. L. Tuan, N. T. T. Trang, D. T. Quang and N. T. Trung, *Theor. Chem. Acc.*, 2017, **136**, 1-12.

[17] V. Dimitrova, S. Ilieva and B. Galabov, *J. Phys. Chem. A*, 2002, **106**, 11801-11805.

[18] G. Ferguson and K.M.S. Islam, *J. Chem. Soc B*, **1966**, 593.

[19] E. Steinwender, E. T. G. Lutz, J. H. Van der Maas and J. A. Kanters, 1993, **4**, 217-229.



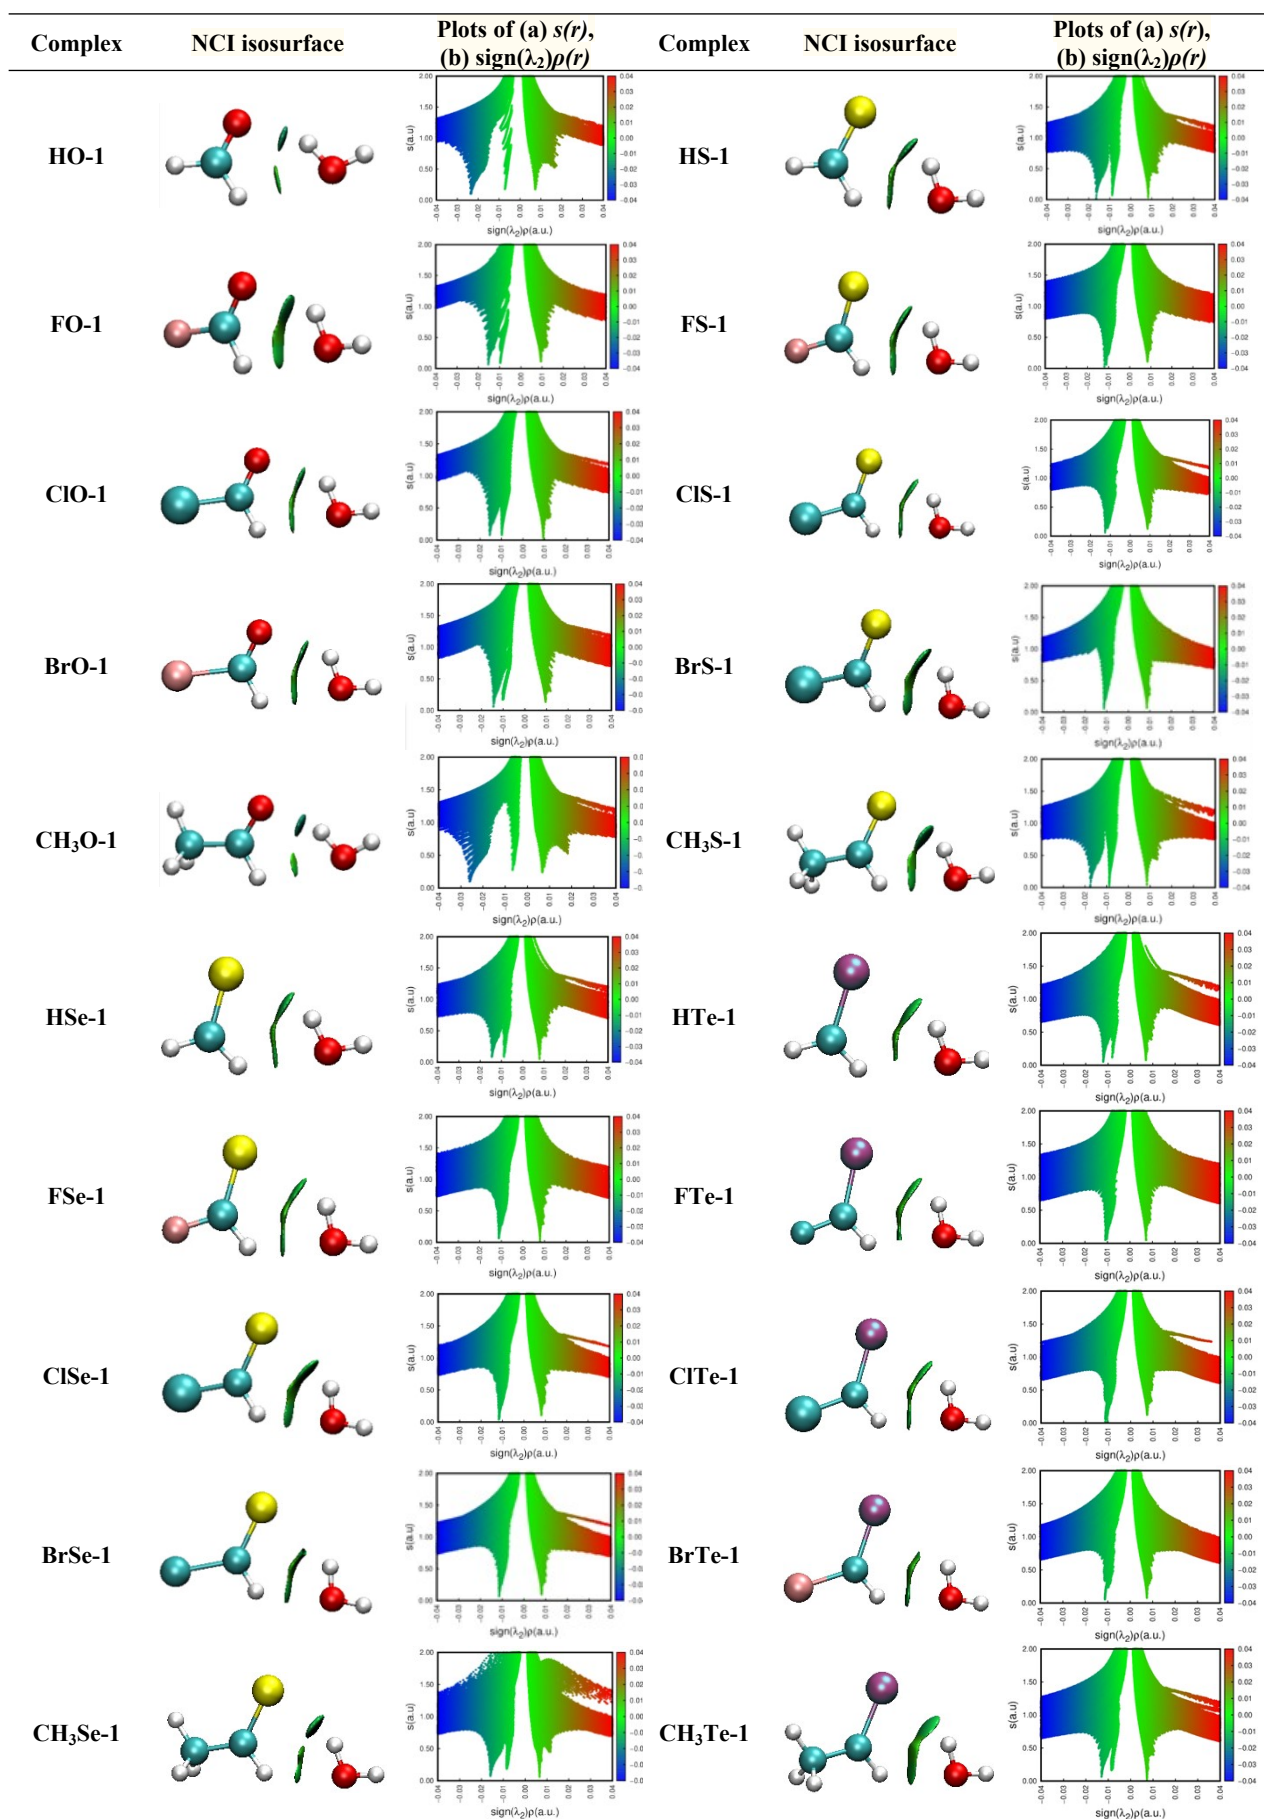

**Figure S1a.** NCI isosurface and plots of  $s(r)$  as a function of  $\text{sign}(\lambda_2)\rho(r)$  for **XZ-1** complexes  
*(The surfaces are colored on a blue-green-red scale according to the values of  $\text{sign}(\lambda_2)\rho(r)$  ranging from  $-0.04$  to  $0.04$  a.u.)*

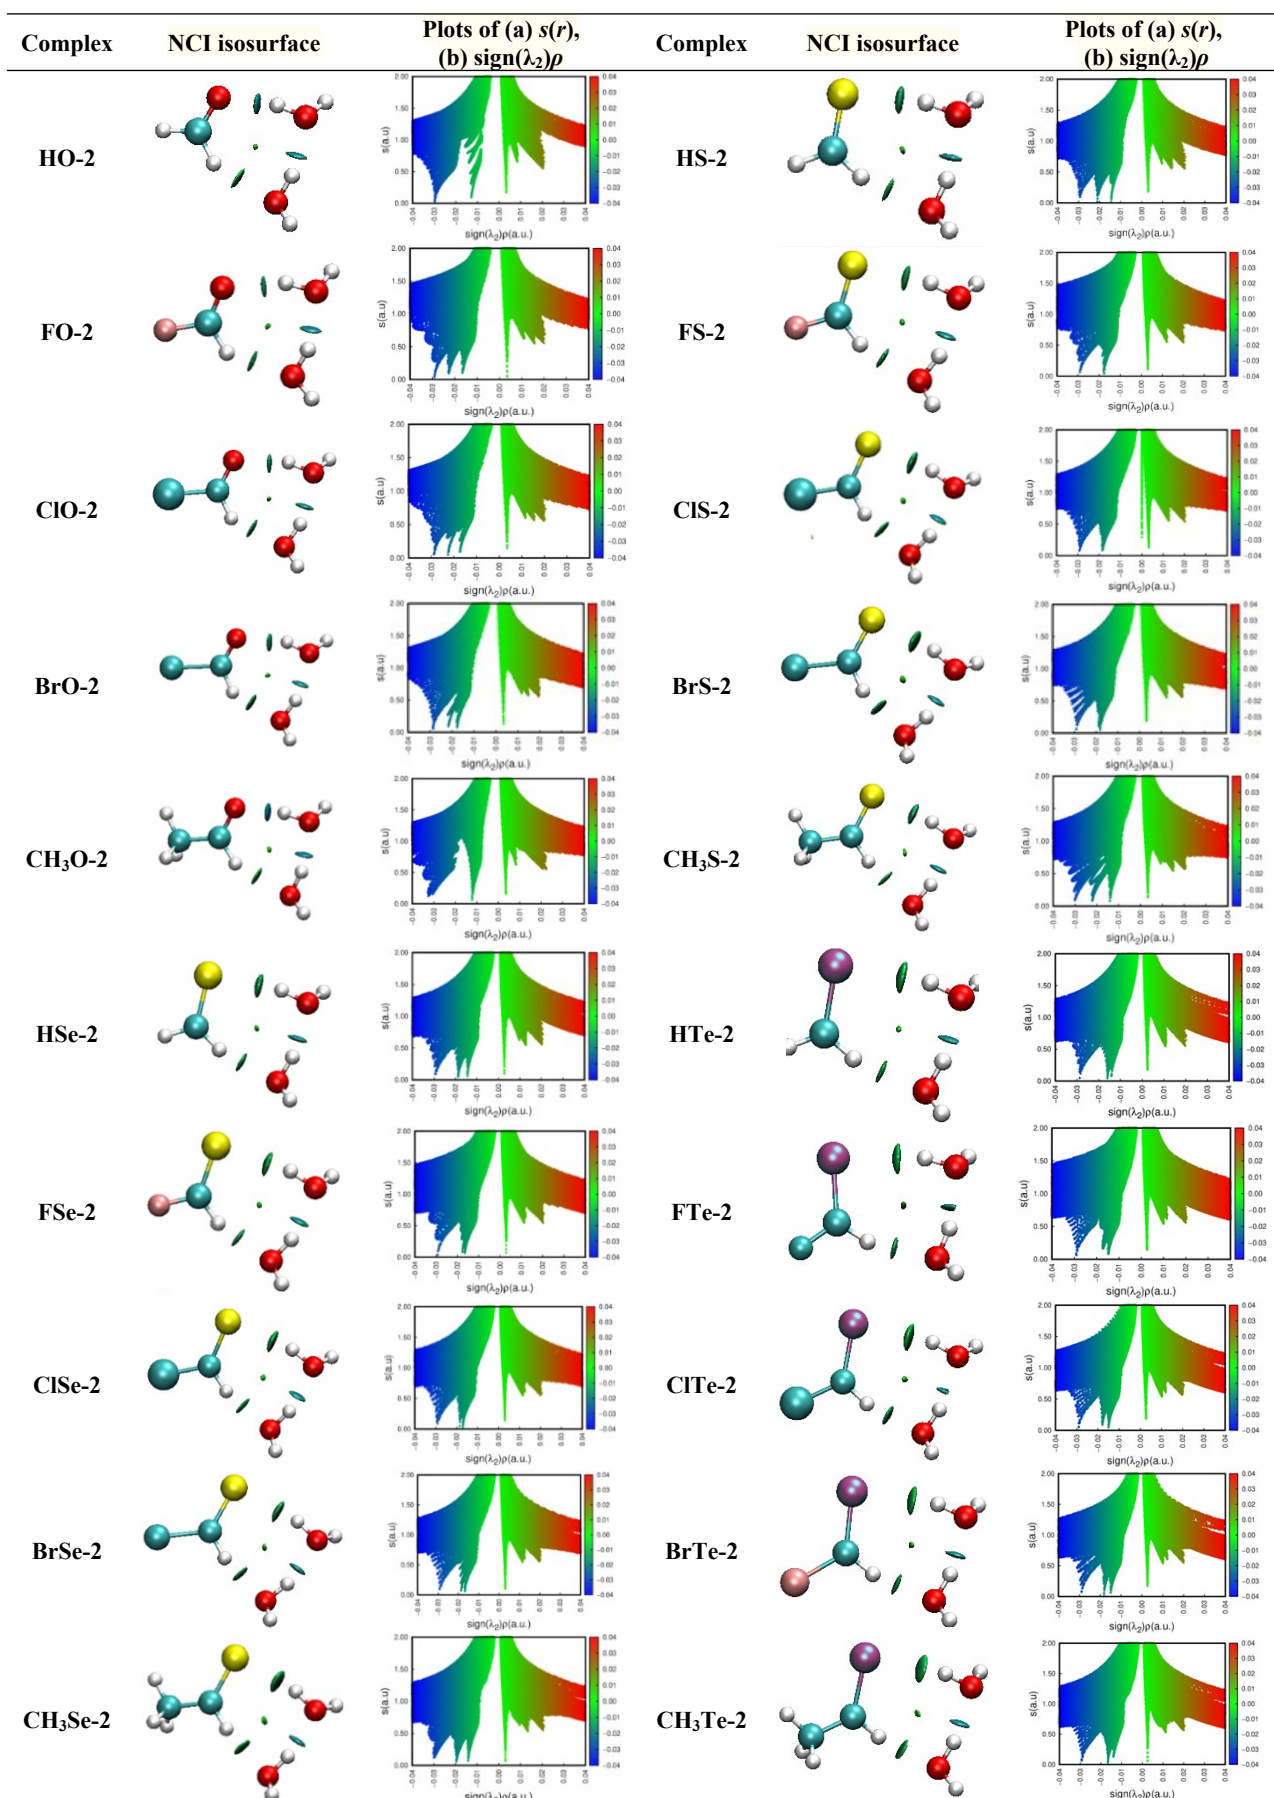

**Figure S1b.** NCI isosurface and plots of  $s(r)$  as a function of  $\text{sign}(\lambda_2)\rho(r)$  for **XZ-2** complexes  
*(The surfaces are colored on a blue-green-red scale according to the values of  $\text{sign}(\lambda_2)\rho(r)$  ranging from  $-0.04$  to  $0.04$  a.u.)*

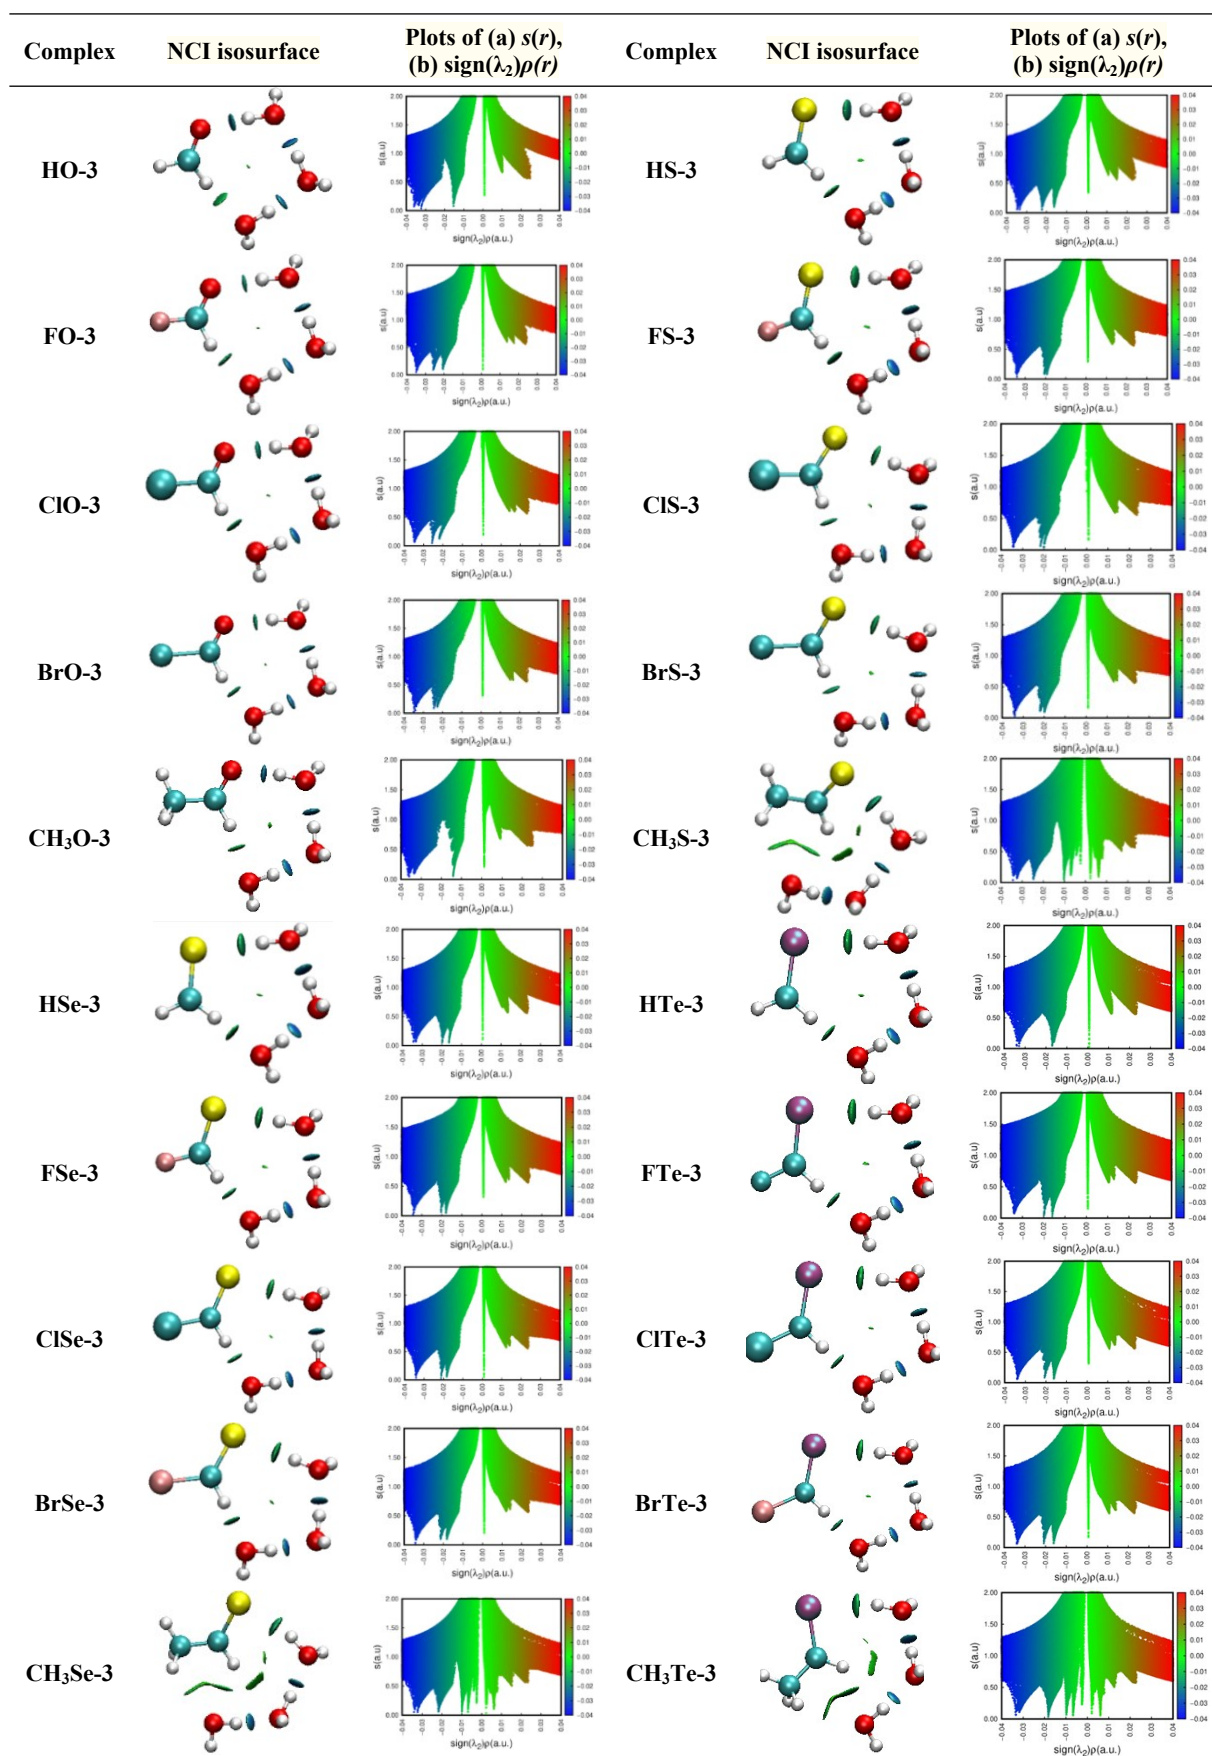

**Figure S1c.** NCI isosurface and plots of  $s(r)$  as a function of  $\text{sign}(\lambda_2)\rho(r)$  for **XZ-3** complexes  
*(The surfaces are colored on a blue-green-red scale according to the values of  $\text{sign}(\lambda_2)\rho(r)$  ranging from  $-0.04$  to  $0.04$  a.u.)*

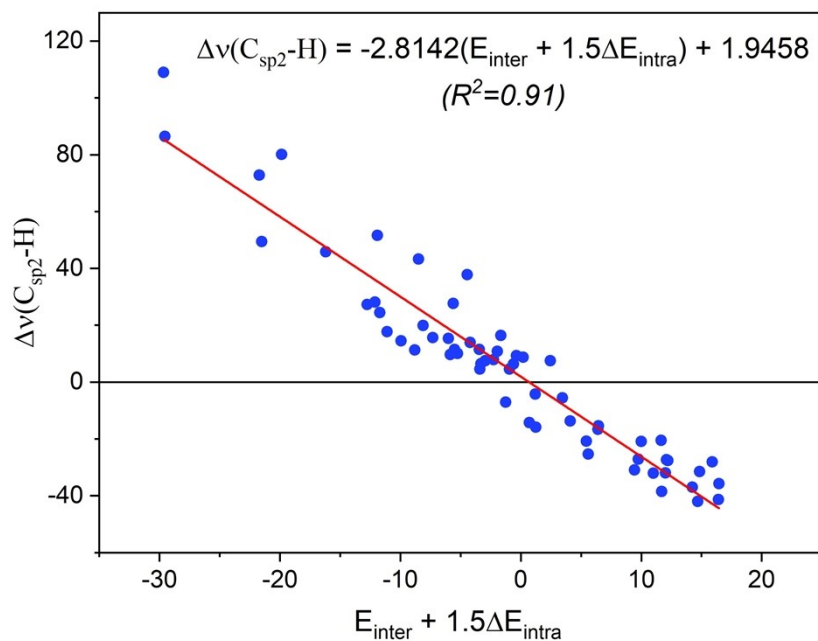

**Figure S2.** The linear correlation of change in stretching frequency  $\Delta\nu(\text{C}_{\text{sp}^2}\text{-H})$  with respective to intermolecular hyperconjugative interaction energies and changes of intramolecular hyperconjugative interaction energies ( $E_{\text{inter}} + 1.5\Delta E_{\text{intra}}$ ) for the obtained complexes at  $\omega\text{B97X-D/6-311++G(3df,2pd)}$ , with X = H, F, Cl, Br, CH<sub>3</sub>; Z = O, S, Se, Te, n = 1-3.
